# Supplementary material
Source: publisher site journal article supplement (https://www.spandidos-publications.com/4125/downloadSupplementary)

Figure S1. Examination of the antiproliferative property of 24a. A panel comprising tumor cell lines was examined against 24a following exposure for 72 h. (A) B38 is murine myeloma, BSC-1 is African green monkey kidney epithelial cells (from *Chlorocebus pygerythrus*, but was originally misidentified as from *Chlorocebus aethiops*; [https://web.expasy.org/cellosaurus/CVCL\\_0607](https://web.expasy.org/cellosaurus/CVCL_0607)), HeLa is human cervical adenocarcinoma, MDA-MB-231 is human breast adenocarcinoma and GM04390A is normal fibroblast. Cells were seeded overnight in 96-well plates as to obtain ~10% confluence at the time of treatment. After 72 h, cell viability was measured by the nucleic acid-binding fluorescent dye, CyQUANT GR (Invitrogen; Thermo Fisher Scientific, Inc.), on a plate reader. (B)  $IC_{50}$  values estimated from A.

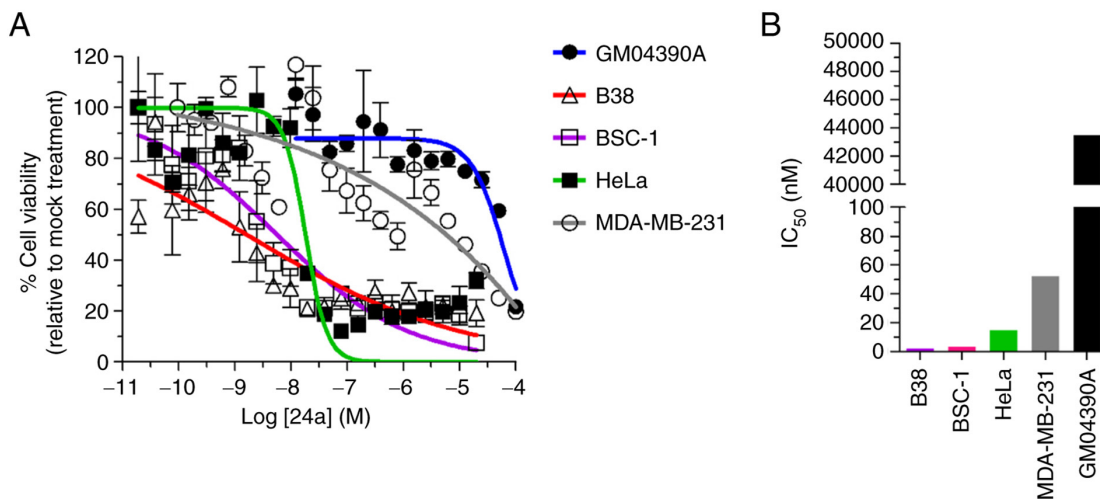

Figure S2. Cell cycle analysis of normal fibroblast and Detroit 562 cells exposed for 24 h to 24a. Representative histograms for the (A) normal fibroblast cell line GM04390 and (B) Detroit 562 cells are shown for the corresponding doses of 24a, with the extracted percentage of cells in different phases reported in Fig. 2A of the manuscript.

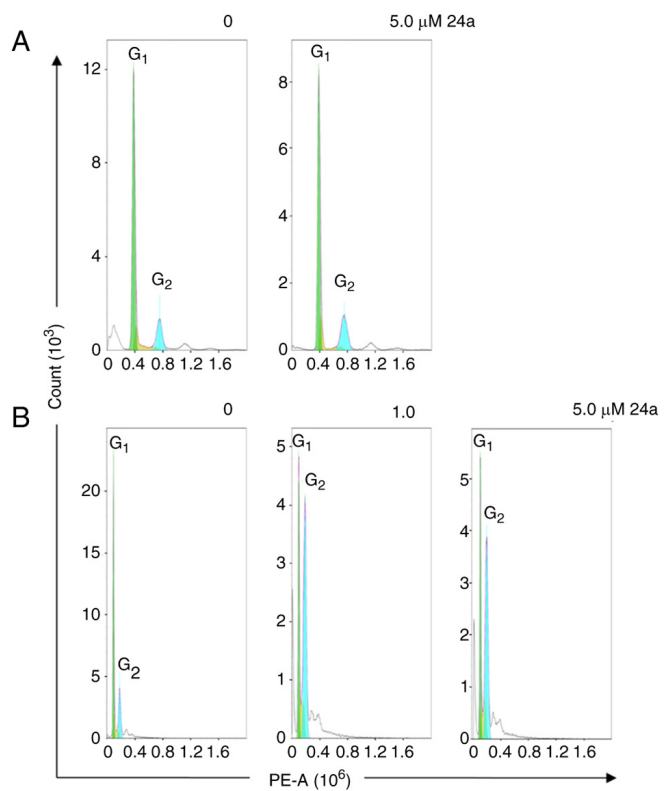

Figure S3. Examination of cell cycle progression of Fast Fucci-expressing Detroit 562 cells following mock treatment (DMSO) shows no increase in PI staining. Shown are representative images after 24-h mock treatment. Scale bar=500  $\mu\text{m}$ . Magnification, x5. PI, propidium iodide.

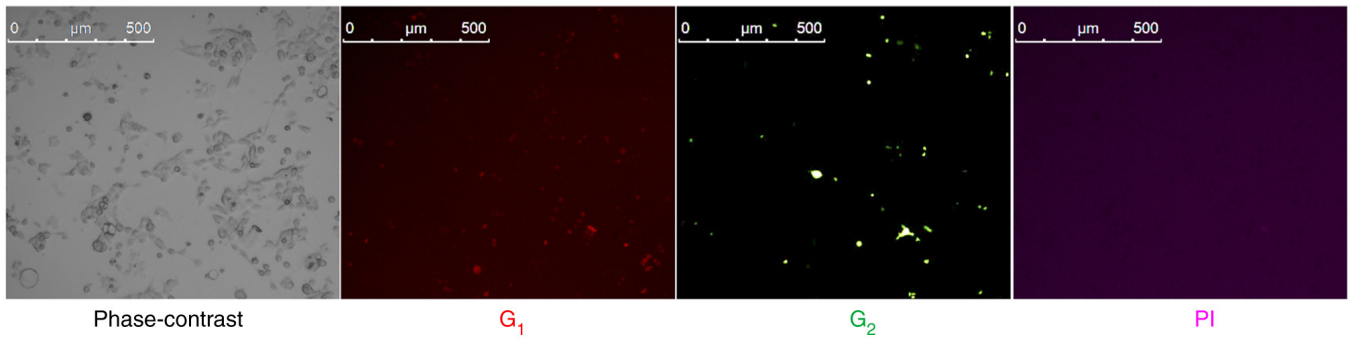

Figure S4. Human Apoptosis Array. (A) Array coordinates referring to the placement of antibody probes for the corresponding apoptosis-related proteins. Each nitrocellulose membrane contains control antibodies spotted in duplicate. (B) Chemiluminescence detection. Membranes were exposed simultaneously for 20 min and the chemiluminescence spots were converted to pixel densities. After subtraction of the signals from the PBS control, the results of the 24a treatments were compared with the DMSO treatment. DR4 and DR5 are shown boxed. DR, death receptor.

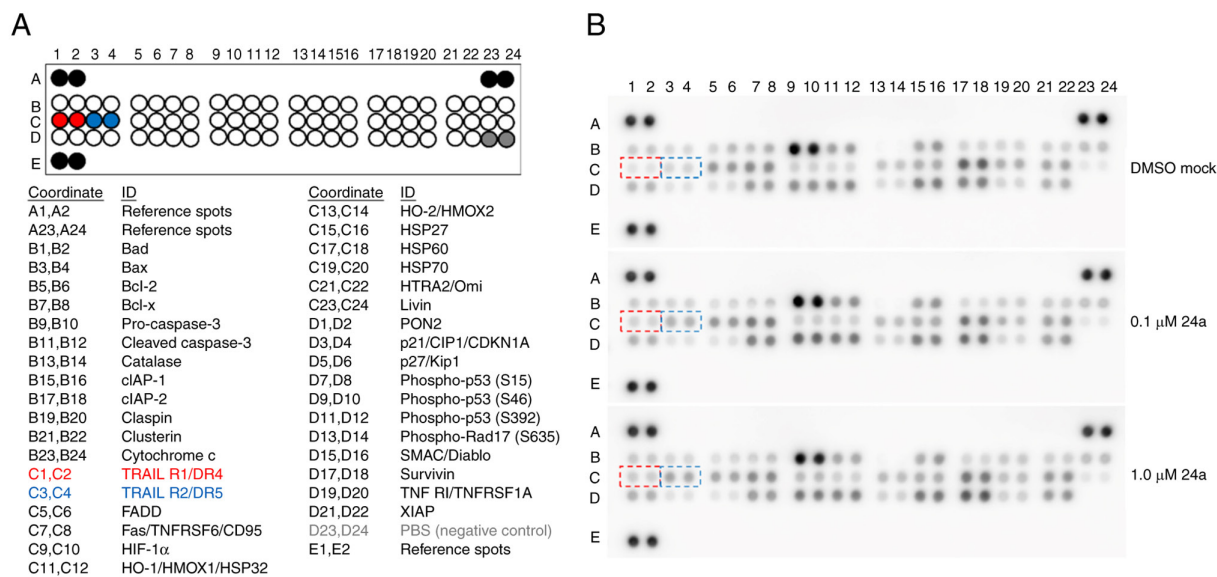

Figure S5. Western blot analysis depicting the lack of involvement of p53 and p53-associated proteins in response to 24a. Cell lysates were prepared from Detroit 562 cells treated with 24a for 24 h at the indicated doses. (A) Examination of the activity of p53 as determined by post-translational modifications. The corresponding Ser and Lys residues represent sites of phosphorylation and acetylation, respectively. (B) Examination of the protein levels of the p53 paralogs, p63 and p73. (C) Examination of the protein levels of the p53 target, p21. Representative blots depicting typical  $\beta$ -actin and GAPDH controls used for quantification are demonstrated. Note that only blots obtained from shorter exposures were used for quantification as to preclude signal saturation. Relative protein levels are summarized in Fig. 4E.

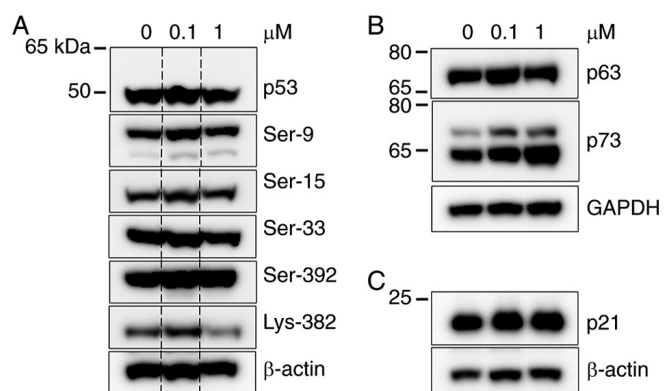

Supplement: Supplementary file 1 [file downloadSupplementary]
